# Supplementary material for: Microdialysis coupled with droplet microfluidics and mass spectrometry for determination of neurotransmitters in vivo with high temporal resolution
Source: Royal Society of Chemistry journal article supplement (doi:10.1039/d4an00112e), 2024-01-01
Supplement: d4an00112e1.pdf [file d4an00112e1.pdf]

Supporting Information for

Microdialysis Coupled with Droplet Microfluidics and Mass Spectrometry for Determination of  
Neurotransmitters *in vivo* with High Temporal Resolution

Shane S. Wells, Ian J. Bain, Alec C. Valenta, Ashley Lenhart, Daniel J. Steyer, Robert T.  
Kennedy\*

Department of Chemistry, University of Michigan, 930 N. University Ave, Ann Arbor, MI  
48109-1055

Corresponding Author:

Robert Kennedy

Email: [rtkenn@umich.edu](mailto:rtkenn@umich.edu)

Tel: 734-615-4363

Table SI-1: List of all transitions, dwell times, and collision voltages used for MS/MS analysis.

| <b>Compound</b> | <b>Parent (m/z)</b> | <b>Daughter (m/z)</b> | <b>Dwell (s)</b> | <b>Collision (V)</b> | <b>Calibration High Point (nM)</b> | <b>Calibration Low Point (nM)</b> |
|-----------------|---------------------|-----------------------|------------------|----------------------|------------------------------------|-----------------------------------|
| <b>GABA</b>     | 104                 | 87                    | 0.15             | 10                   | 200                                | 10                                |
| <b>d6GABA</b>   | 110                 | 93                    | 0.03             | 12                   |                                    |                                   |
| <b>AMPH</b>     | 136.1               | 119.1                 | 0.03             | 15                   |                                    |                                   |
| <b>ACh</b>      | 146                 | 87                    | 0.1              | 17                   | 100                                | 5                                 |
| <b>Glu</b>      | 148                 | 130                   | 0.1              | 8                    | 600                                | 30                                |
| <b>d4ACh</b>    | 150                 | 91.1                  | 0.03             | 17                   |                                    |                                   |
| <b>13C5Glu</b>  | 153                 | 135                   | 0.04             | 10                   |                                    |                                   |
| <b>DA</b>       | 154                 | 137                   | 0.15             | 13                   | 100                                | 5                                 |
| <b>d4DA</b>     | 158                 | 141                   | 0.05             | 13                   |                                    |                                   |
| <b>5HT</b>      | 177                 | 160.1                 | 0.15             | 12                   | 100                                | 5                                 |
| <b>d45HT</b>    | 181                 | 164                   | 0.03             | 15                   |                                    |                                   |
| <b>Ado</b>      | 268                 | 136.1                 | 0.05             | 18                   | 200                                | 10                                |
| <b>d1Ado</b>    | 269                 | 137                   | 0.04             | 18                   |                                    |                                   |

Table SI-2: Summary of conditions used for ESI-MS/MS analysis of dialysate samples collected in vivo and for calibration.

|          |                    |                         |                  |                |
|----------|--------------------|-------------------------|------------------|----------------|
| nESI     | Flow Rate          | Capillary, Cone Voltage | Emitter i.d.     | Drying Gas     |
|          | 50 nL/min          | 1.4 kV, 35 V            | 15 $\mu$ m       | 150 L/hr       |
| Sample   | Matrix (cal//tune) | Matrix (Perfusion)      | Additive         | Dilution       |
|          | aCSF (33% PO4)     | aCSF (no PO4)           | 0.1% Acetic Acid | 1:1, H2O       |
| Analyzer | LM Res 1, 2        | HM Res 1, 2             | Ion Energy 1, 2  | Exit, Entrance |
|          | 14.7, 14.5         | 14.5, 14.5              | 0.5, 0.4         | 5, -1 V        |
| MS/MS    | Span               | Interscan Delay         | Transitions/CE   | Dwell Times    |
|          | 0.3 m/z            | 2.5 ms                  | Table SI-2       | Table SI-2     |

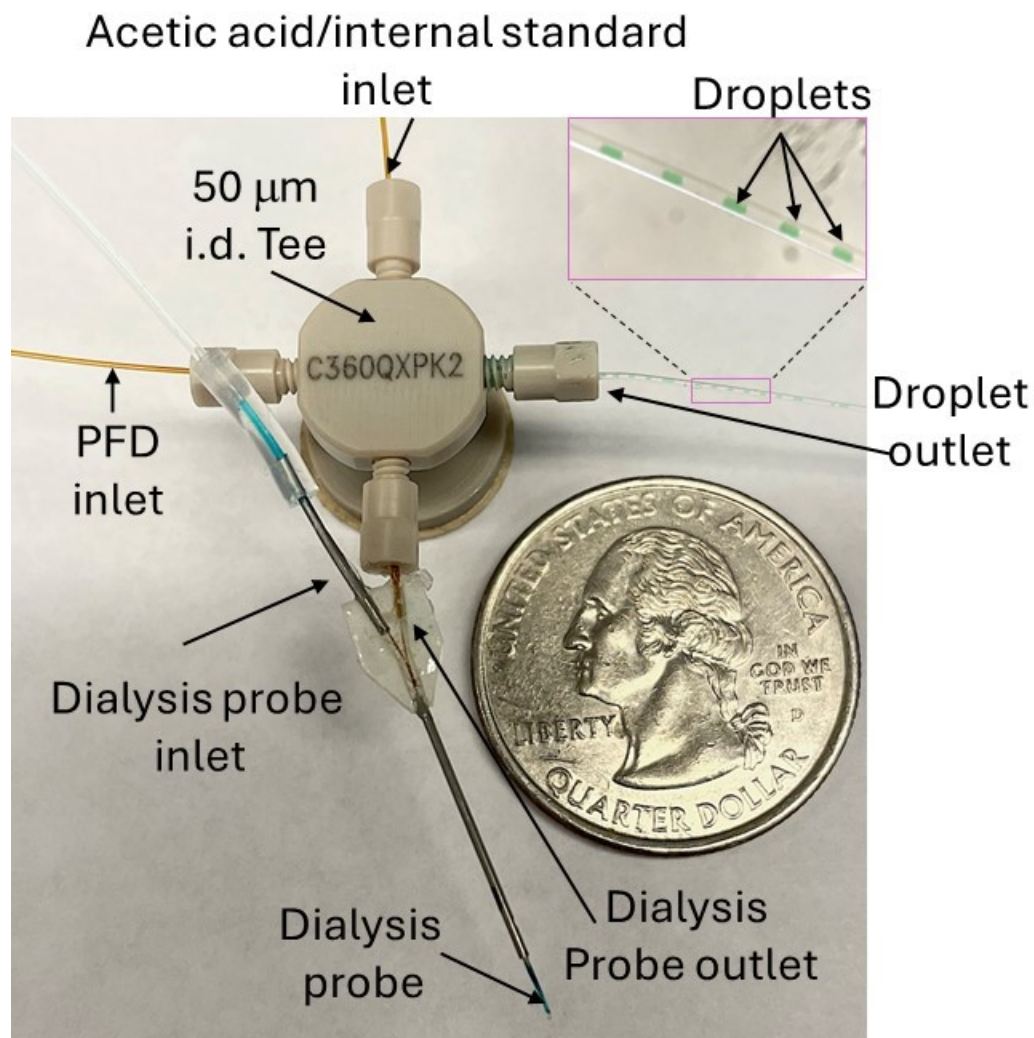

Figure SI-1. Photograph of probe and droplet formation system. Figure corresponds to drawing in Figure 1 in text, except this probe does not have an injection shank on it.

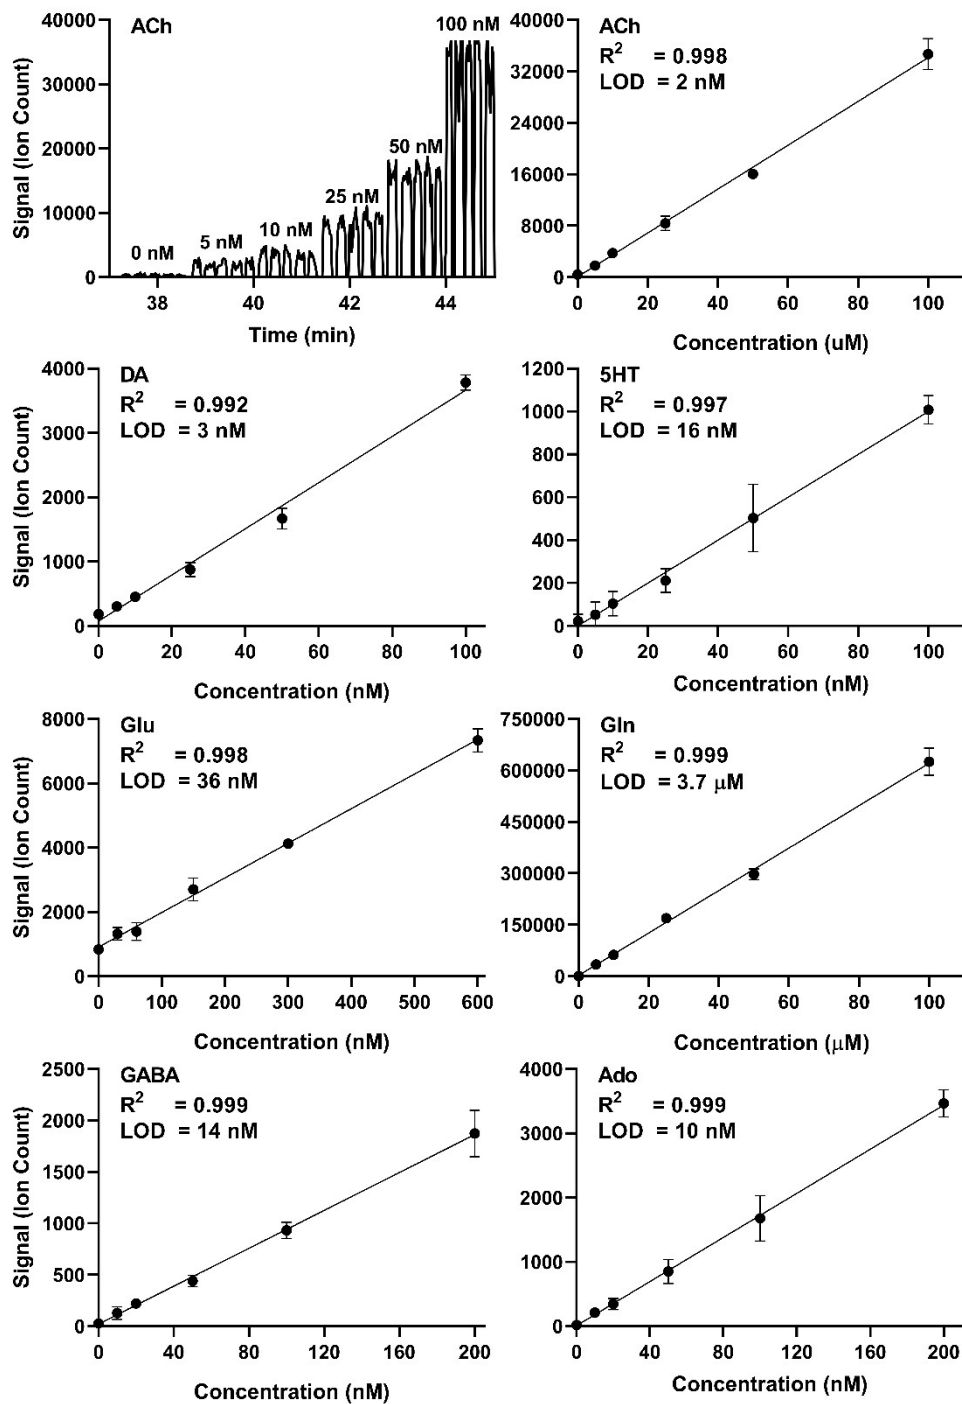

Figure SI-2. Calibration data for ESI-MS/MS of droplet samples of neurotransmitters. (Top Left) MS/MS trace of calibration data for ACh with 5 droplets for each of the 6 calibration levels. Samples were prepared from a well-plate and infused into the mass spectrometer as described in the text. (All other graphs) Average signal intensity versus standard concentration. Error bars are +/- 1 standard deviation for 3 replicates. These are the curves used for quantitation during one day of in vivo experiments. LOD is calculated using the limit of the blank method.

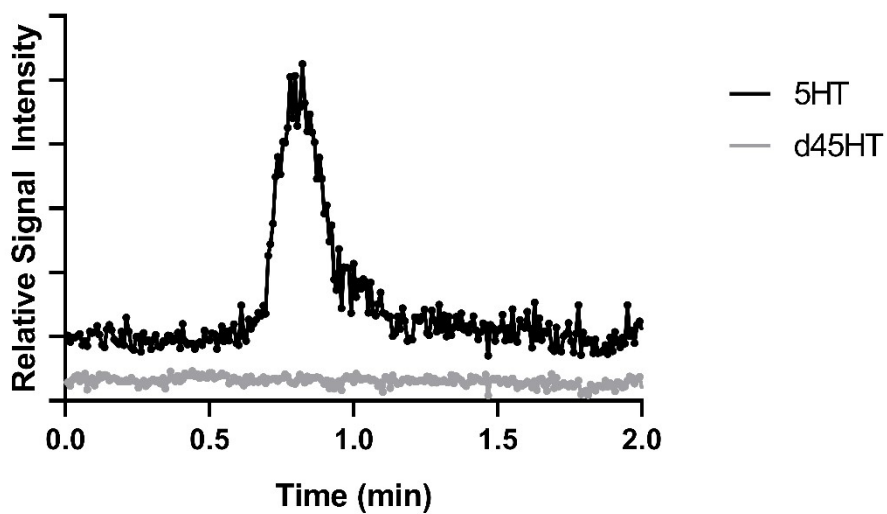

Figure SI-3. Example of single replicate that showed significant 5HT response to AMPH stimulation. The black dots and connecting lines represent MS/MS single for 5HT concentrations collected during AMPH stimulation and the gray dots and lines represent the internal standard d45HT used during droplet generation and nESI-MS/MS.
